# Supplementary material for: Boosting Reversibility of Mn‐Based Tunnel‐Structured Cathode Materials for Sodium‐Ion Batteries by Magnesium Substitution
Source: PubMed Central journal article supplement (PMC8097362; doi:10.1002/advs.202004448), 2021-02-18
Supplement: ADVS-8-2004448-s001.pdf [file ADVS-8-2004448-s001.pdf]

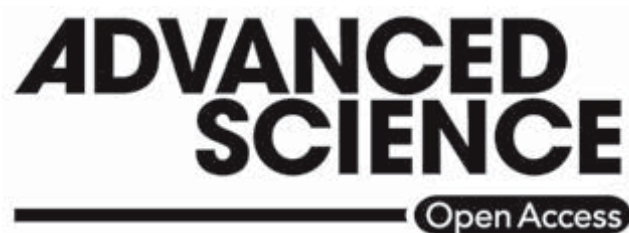

## Supporting Information

for *Adv. Sci.*, DOI: 10.1002/adv.202004448

### **Boosting reversibility of Mn-Based tunnel-structured cathode materials for sodium-ion batteries by magnesium substitution**

*Xun-Lu Li, Jian Bao, Yi-Fan Li, Dong Chen, Cui Ma, Qi-Qi Qiu, Xin-Yang Yue, Qin-Chao Wang\* and Yong-Ning Zhou\**

## Supporting Information

**Boosting reversibility of Mn-based tunnel-structured cathode materials for sodium-ion batteries by magnesium substitution**

*Xun-Lu Li, Jian Bao, Yi-Fan Li, Dong Chen, Cui Ma, Qi-Qi Qiu, Xin-Yang Yue, Qin-Chao Wang\* and Yong-Ning Zhou\**

$$I_p = 2.69 \times 10^5 n^{3/2} A D^{1/2} v^{1/2} C_0 \quad \text{Equation S1}$$

Note:  $I_p$  is the peak currents of the oxidation and reduction peaks in the CV,  $D$  is the diffusion coefficient of  $\text{Na}^+$ .  $n$  is the number of electrons per reaction species,  $A$  is the area of the electrode,  $C_0$  is the concentration of  $\text{Na}^+$  in the lattice,  $v$  is scan rates.

$$D_{\text{Na}^+} = R^2 T^2 / 2 A^2 n^4 F^4 C^2 \sigma^2 \quad \text{Equation S2}$$

Note:  $R$  is the gas constant ( $8.314 \text{ J K}^{-1} \text{ mol}^{-1}$ ),  $T$  is the test temperature (298 K),  $A$  is the surface area of the electrode.  $n$  is the number of the electrons per molecule during oxidization,  $F$  is the Faraday constant ( $96485 \text{ C mol}^{-1}$ ),  $C$  is molar concentration of  $\text{Na}^+$ ,  $\sigma$  is the Warburg factor ( $\Omega \text{ s}^{-1/2}$ ) associated with  $Z'$  (real part of the cell impedance,  $\Omega$ ) and  $\omega$  (the angular frequency,  $\text{rad s}^{-1}$ )

$$Z' = R_e + R_{ct} + \sigma \omega^{-1/2} \quad \text{Equation S3}$$

Note:  $R_e$  is the resistance of the electrolyte,  $R_{ct}$  is the charge transfer resistance<sup>[S1]</sup>.

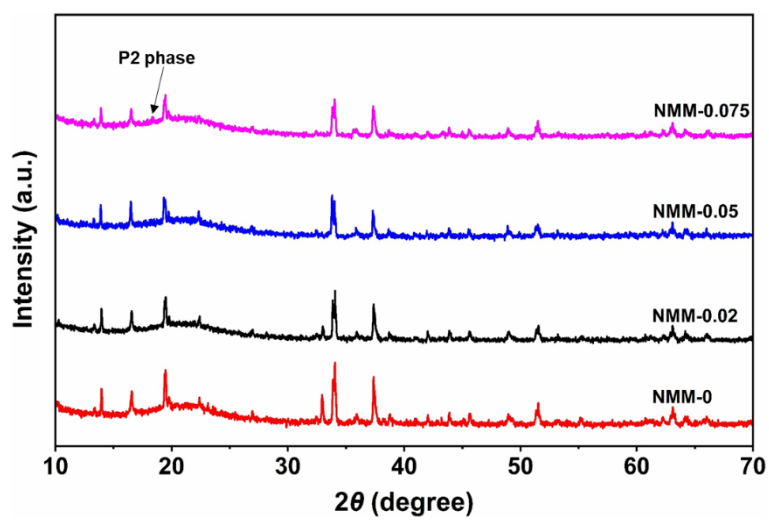

**Figure S1.** XRD patterns of Na<sub>0.44</sub>MnO<sub>2</sub> (NMM-0), Na<sub>0.44</sub>Mn<sub>0.98</sub>Mg<sub>0.02</sub>O<sub>2</sub> (NMM-0.02), Na<sub>0.44</sub>Mn<sub>0.95</sub>Mg<sub>0.05</sub>O<sub>2</sub> (NMM-0.05), and Na<sub>0.44</sub>Mn<sub>0.925</sub>Mg<sub>0.075</sub>O<sub>2</sub> (NMM-0.075).

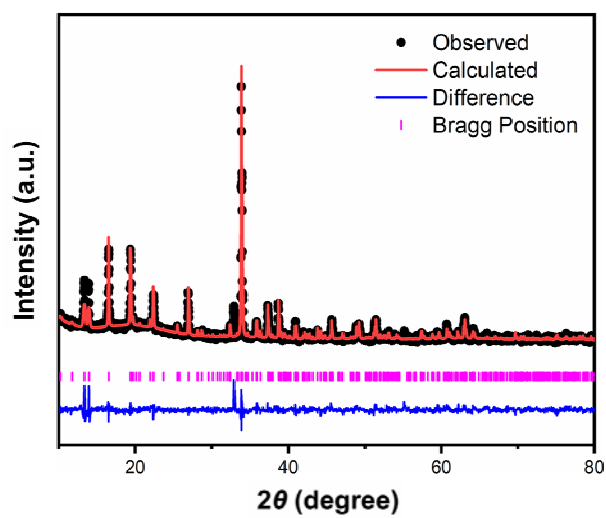

**Figure S2.** Rietveld refinement of the XRD pattern for  $\text{Na}_{0.44}\text{MnO}_2$ .

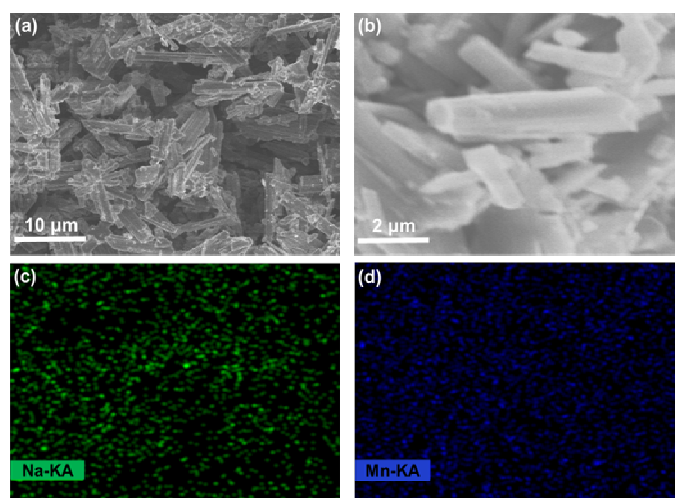

**Figure S3.** SEM images of a, b) NMM-0 and corresponding EDX mapping of c) Na and d) Mn.

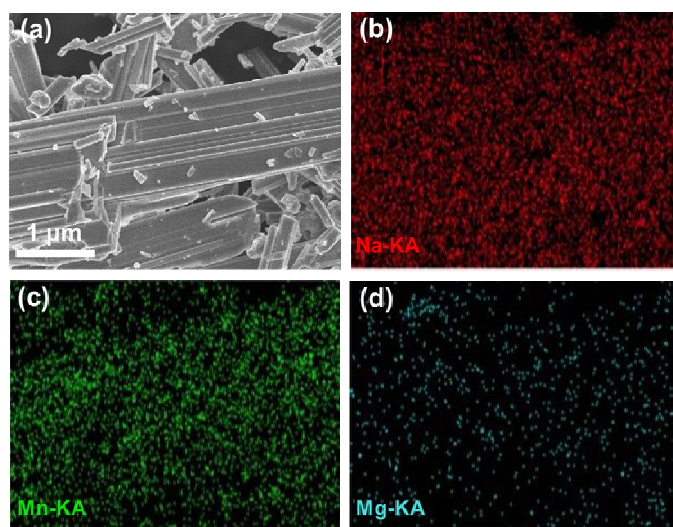

**Figure S4.** SEM image of a) NMM-0.05 and corresponding EDX mapping of b) Na, c) Mn and d) Mg.

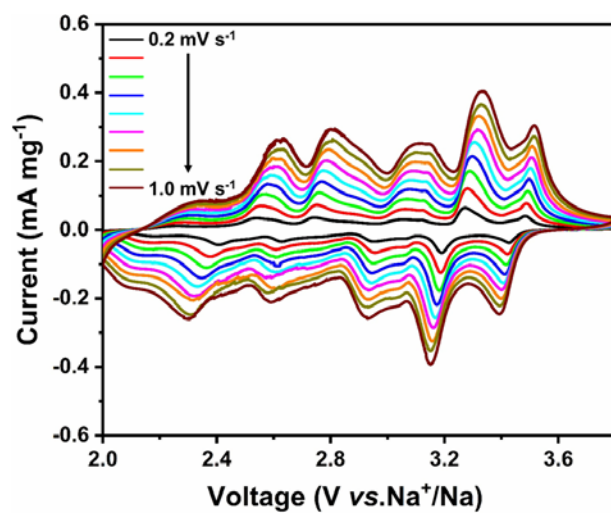

**Figure S5.** CV curves of NMM-0 with scan rates increasing from 0.2 to 1 mV s<sup>-1</sup>.

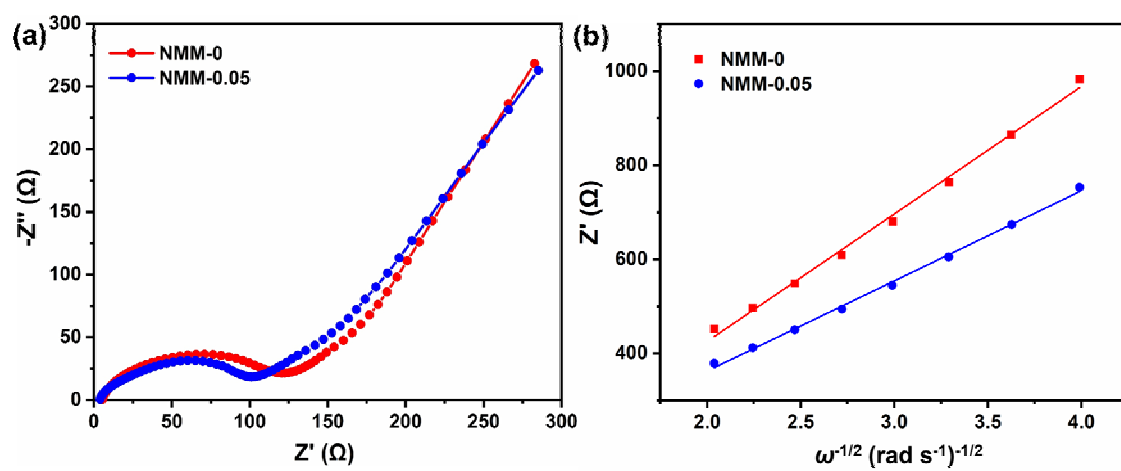

**Figure S6.** a) EIS spectra of NMM-0 (red) and NMM-0.05 (blue) after 20 cycles. b) Plots of  $Z'$  as a function of  $\omega^{-1/2}$  in the low frequency region.



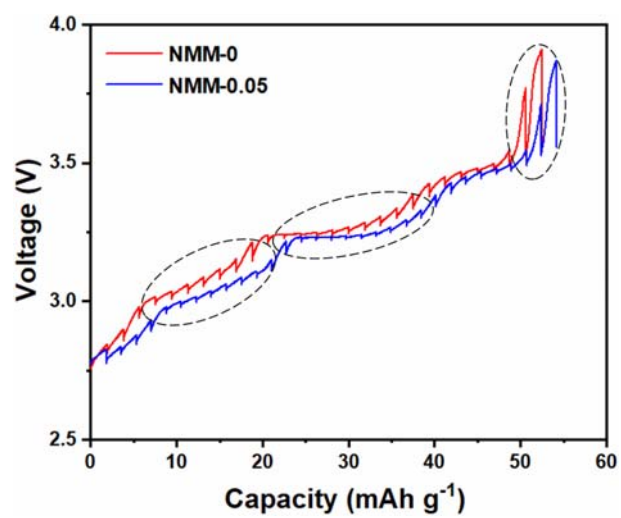

**Figure S7.** GITT curves of NMM-0 and NMM-0.05 in the first charge process.

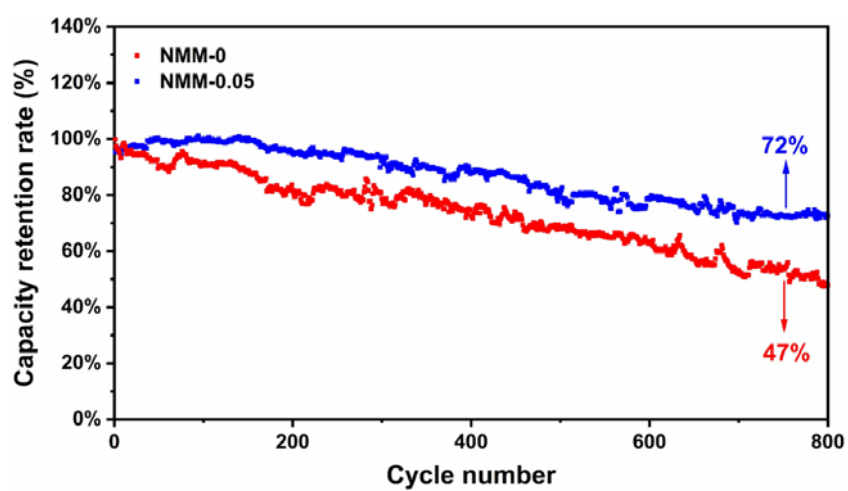

**Figure S8.** The capacity retention rates of NMM-0 and NMM-0.05 at 5C.

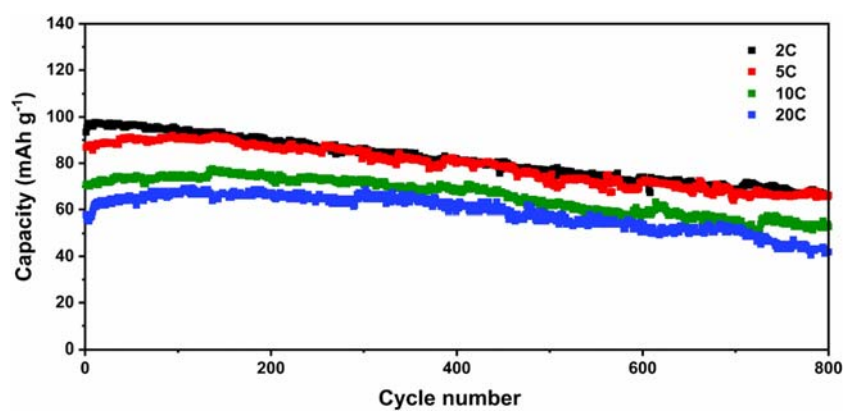

**Figure S9.** Long cycle performance of NMM-0.05 at 2C (black), 5C (red), 10C (green), and 20C (blue).

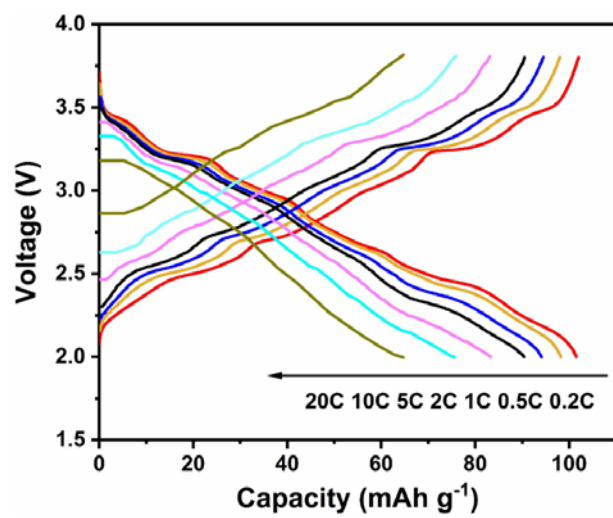

**Figure S10.** The galvanostatic GCD curves of NMM-0.05 between 2.0-3.8 V vs. Na<sup>+</sup>/Na at different current densities.

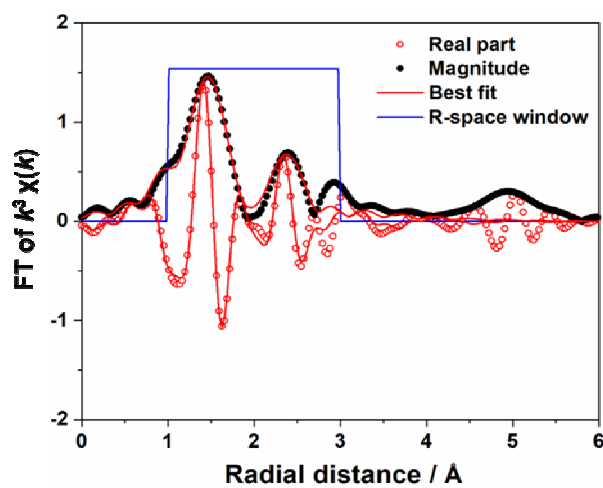

**Figure S11.** Least-square fits of the calculated FT-EXAFS phase and amplitude functions to the experimental EXAFS spectra for the pristine NMM-0.05.

**Table S1.** Crystallographic parameters of Na<sub>0.44</sub>MnO<sub>2</sub> refined by Rietveld method.

| Space group: <i>Pbam</i> (No. 55)                                                |                  |       |        |        |     |           |
|----------------------------------------------------------------------------------|------------------|-------|--------|--------|-----|-----------|
| Atom                                                                             | element          | Mult. | x      | y      | z   | Occupancy |
| Mn1                                                                              | Mn <sup>4+</sup> | 2     | 0      | 0.5    | 0   | 1         |
| Mn2                                                                              | Mn <sup>3+</sup> | 4     | 0.3570 | 0.0934 | 0.5 | 1         |
| Mn3                                                                              | Mn <sup>4+</sup> | 4     | 0.0350 | 0.1005 | 0   | 1         |
| Mn4                                                                              | Mn <sup>4+</sup> | 4     | 0.3490 | 0.3067 | 0.5 | 1         |
| Mn5                                                                              | Mn <sup>3+</sup> | 4     | 0.0260 | 0.3080 | 0   | 1         |
| Na6                                                                              | Na <sup>+</sup>  | 4     | 0.2010 | 0.1890 | 0   | 1         |
| Na7                                                                              | Na <sup>+</sup>  | 4     | 0.2960 | 0.4090 | 0.5 | 1         |
| Na8                                                                              | Na <sup>+</sup>  | 4     | 0.1240 | 0.0038 | 0   | 1         |
| O9                                                                               | O <sup>2-</sup>  | 4     | 0.3540 | 0.0020 | 0.5 | 1         |
| O10                                                                              | O <sup>2-</sup>  | 4     | 0.2600 | 0.0930 | 0   | 1         |
| O11                                                                              | O <sup>2-</sup>  | 4     | 0.0660 | 0.1920 | 0.5 | 1         |
| O12                                                                              | O <sup>2-</sup>  | 4     | 0.5290 | 0.1830 | 0.5 | 1         |
| O13                                                                              | O <sup>2-</sup>  | 4     | 0.1790 | 0.3020 | 0.5 | 1         |
| O14                                                                              | O <sup>2-</sup>  | 4     | 0.3920 | 0.3017 | 0   | 1         |
| O15                                                                              | O <sup>2-</sup>  | 4     | 0.2300 | 0.4000 | 0   | 1         |
| O16                                                                              | O <sup>2-</sup>  | 4     | 0.5140 | 0.0870 | 0   | 1         |
| O17                                                                              | O <sup>2-</sup>  | 4     | 0.4850 | 0.4100 | 0.5 | 1         |
| $a=9.100(6)$ $b=26.394(5)$ $c=2.828(7)$ $V=679.4(9)$ $R_p=1.5\%$ $R_{wp}=2.53\%$ |                  |       |        |        |     |           |

**Table S2.** Crystallographic parameters of Na<sub>0.44</sub>Mn<sub>0.95</sub>Mg<sub>0.05</sub>O<sub>2</sub> refined by Rietveld method.

| Space group: <i>Pbam</i> (No. 55)                                                                                                      |                  |       |          |          |          |           |
|----------------------------------------------------------------------------------------------------------------------------------------|------------------|-------|----------|----------|----------|-----------|
| Atom                                                                                                                                   | element          | Mult. | <i>x</i> | <i>y</i> | <i>z</i> | Occupancy |
| Mn1                                                                                                                                    | Mn <sup>4+</sup> | 2     | 0        | 0.5000   | 0        | 1         |
| Mn2                                                                                                                                    | Mn <sup>3+</sup> | 4     | 0.5130   | 0.0533   | 0.5      | 1         |
| Mn3                                                                                                                                    | Mn <sup>4+</sup> | 4     | 0.0297   | 0.1006   | 0        | 1         |
| Mn4                                                                                                                                    | Mn <sup>4+</sup> | 4     | 0.3570   | 0.3050   | 0.5      | 1         |
| Mg5                                                                                                                                    | Mg <sup>2+</sup> | 4     | 0.0380   | 0.2956   | 0        | 0.45      |
| Mn5                                                                                                                                    | Mn <sup>3+</sup> | 4     | 0.0380   | 0.2956   | 0        | 0.55      |
| Na6                                                                                                                                    | Na <sup>+</sup>  | 4     | 0.2460   | 0.2058   | 0        | 1         |
| Na7                                                                                                                                    | Na <sup>+</sup>  | 4     | 0.1980   | 0.3878   | 0.5      | 1         |
| Na8                                                                                                                                    | Na <sup>+</sup>  | 4     | 0.1360   | 0.0200   | 0        | 1         |
| O9                                                                                                                                     | O <sup>2-</sup>  | 4     | 0.1790   | 0.0030   | 0.5      | 1         |
| O10                                                                                                                                    | O <sup>2-</sup>  | 4     | 0.2550   | 0.0912   | 0        | 1         |
| O11                                                                                                                                    | O <sup>2-</sup>  | 4     | 0.1240   | 0.1928   | 0.5      | 1         |
| O12                                                                                                                                    | O <sup>2-</sup>  | 4     | 0.3880   | 0.2173   | 0.5      | 1         |
| O13                                                                                                                                    | O <sup>2-</sup>  | 4     | 0.0950   | 0.2925   | 0.5      | 1         |
| O14                                                                                                                                    | O <sup>2-</sup>  | 4     | 0.3090   | 0.2940   | 0        | 1         |
| O15                                                                                                                                    | O <sup>2-</sup>  | 4     | 1.5270   | 0.7028   | 0        | 1         |
| O16                                                                                                                                    | O <sup>2-</sup>  | 4     | 0.3510   | 0.1290   | 0        | 1         |
| O17                                                                                                                                    | O <sup>2-</sup>  | 4     | 0.4160   | 0.4134   | 0.5      | 1         |
| <i>a</i> =9.082(3) <i>b</i> =26.432(5) <i>c</i> =2.824(8) <i>V</i> =678.16(4) <i>R<sub>p</sub></i> =3.48% <i>R<sub>wp</sub></i> =4.60% |                  |       |          |          |          |           |

**Table S3.** EDX results of NMM-0.

| <b>Element</b> | <b>Series</b> | <b>Atom ratio [at%]</b> | <b>Deviation [%]</b> |
|----------------|---------------|-------------------------|----------------------|
| Na             | K             | 31.48                   | 0.92                 |
| Mn             | K             | 68.52                   | 0.92                 |



**Table S4.** EDX results of NMM-0.05.

| Element | Series | Atom ratio [at%] | Deviation [%] |
|---------|--------|------------------|---------------|
| Na      | K      | 32.67            | 2.0           |
| Mn      | K      | 63.52            | 1.5           |
| Mg      | K      | 3.81             | 0.4           |

**Table S5.** ICP results of the synthesized  $\text{Na}_{0.44}\text{Mn}_{0.95}\text{Mg}_{0.05}\text{O}_2$ .

| <b>Na</b> | <b>Mn</b> | <b>Mg</b> |
|-----------|-----------|-----------|
| 0.441     | 0.952     | 0.048     |

**Table S6.**  $D_{\text{Na}^+}$  values of NMM-0 and NMM-0.05 at the 20<sup>th</sup> cycle and 80<sup>th</sup> cycle, respectively.

| Sample   | 20 <sup>th</sup> $D_{\text{Na}^+}$ ( $\text{cm}^2 \text{s}^{-1}$ ) | 80 <sup>th</sup> $D_{\text{Na}^+}$ ( $\text{cm}^2 \text{s}^{-1}$ ) |
|----------|--------------------------------------------------------------------|--------------------------------------------------------------------|
| NMM-0    | $7.314 \times 10^{-11}$                                            | $8.660 \times 10^{-11}$                                            |
| NMM-0.05 | $1.386 \times 10^{-10}$                                            | $5.468 \times 10^{-10}$                                            |

**Table S7** Electrochemical performance comparison of NMM-0.05 with other tunned-structured cathode materials for sodium-ion batteries.

| Samples                                                                                        | Specific capacity<br>(mAh g <sup>-1</sup> @C) | Rate capability<br>(mAh g <sup>-1</sup> @C) | Cycling stability<br>(%@cycle No./C) | Voltage<br>range (V) | Ref.             |
|------------------------------------------------------------------------------------------------|-----------------------------------------------|---------------------------------------------|--------------------------------------|----------------------|------------------|
| Na <sub>0.61</sub> [Mn <sub>0.27</sub> Fe <sub>0.34</sub> Ti <sub>0.39</sub> ]O <sub>2</sub>   | 98@0.1                                        | 43@1                                        | 90@100/0.2                           | 2.6~4.2              | [S2]             |
| Na <sub>0.66</sub> [Mn <sub>0.66</sub> Ti <sub>0.34</sub> ]O <sub>2</sub>                      | 74@0.1                                        | -                                           | 86@400/0.1                           | 2.5~3.9              | [S3]             |
| Na <sub>0.44</sub> MnO <sub>2</sub> nanofiber                                                  | 118@0.42                                      | 69.5@10                                     | 67@140/0.42                          | 1.5~4.0              | [S4]             |
| Na <sub>0.5</sub> MnO <sub>2</sub>                                                             | 115@0.1                                       | 100@2                                       | 95@30/0.33                           | 2.0~4.0              | [S5]             |
| Na <sub>0.66</sub> [Mn <sub>0.66</sub> Ti <sub>0.34</sub> ]O <sub>1.94</sub> F <sub>0.06</sub> | 97@0.2                                        | 65@20                                       | 87@1000/2                            | 1.5~3.8              | [S6]             |
| <b>NMM-0.05</b>                                                                                | 105@0.2                                       | 60@30                                       | 72@800/5                             | 2.0~3.8              | <b>This work</b> |

**Table S8.** Evolution of Mn K-edge EXAFS structural parameters at various states for NMM-0.05.

| Samples          | Path  | $r / \text{\AA}$  | $\sigma^2 / 10^{-3} \text{\AA}^2$ | $\Delta E / \text{eV}$ | R     |
|------------------|-------|-------------------|-----------------------------------|------------------------|-------|
| Pristine         | Mn-O  | $1.892 \pm 0.076$ | $1.232 \pm 1.694$                 | $-1.922 \pm 2.577$     | 0.001 |
|                  | Mn-TM | $2.786 \pm 0.099$ | $9.202 \pm 1.857$                 | $-14.654 \pm 3.564$    |       |
| Fully charged    | Mn-O  | $1.874 \pm 0.075$ | $0.336 \pm 0.800$                 | $-0.075 \pm 1.042$     | 0.001 |
|                  | Mn-TM | $2.762 \pm 0.059$ | $5.838 \pm 0.722$                 | $-7.770 \pm 1.498$     |       |
| Fully discharged | Mn-O  | $1.902 \pm 0.065$ | $1.435 \pm 2.375$                 | $-0.367 \pm 4.144$     | 0.001 |
|                  | Mn-TM | $2.821 \pm 0.124$ | $10.402 \pm 3.476$                | $-18.602 \pm 8.730$    |       |

**r: bond length;  $\sigma^2$ : Debye-Waller factor (disorder);  $\Delta E$ : inner shell potential shift; R: R-factor**

**Table S9.** Atom population analysis of NMM-0.

| <b>Atom</b> | <b>Number</b> | <b><i>s</i></b> | <b><i>p</i></b> | <b><i>d</i></b> | <b>Total</b> |
|-------------|---------------|-----------------|-----------------|-----------------|--------------|
| Mn          | 1             | 0.58            | 0.52            | 5.23            | 6.33         |
| Mn          | 2             | 0.58            | 0.52            | 5.23            | 6.33         |
| Mn          | 3             | 0.59            | 0.46            | 5.2             | 6.25         |
| Mn          | 4             | 0.53            | 0.51            | 5.24            | 6.28         |
| Mn          | 5             | 0.59            | 0.46            | 5.2             | 6.25         |
| Mn          | 6             | 0.53            | 0.51            | 5.24            | 6.28         |
| Mn          | 7             | 0.59            | 0.46            | 5.2             | 6.25         |
| Mn          | 8             | 0.53            | 0.51            | 5.24            | 6.28         |
| Mn          | 9             | 0.59            | 0.46            | 5.2             | 6.25         |
| Mn          | 10            | 0.53            | 0.51            | 5.24            | 6.28         |
| Mn          | 11            | 0.59            | 0.53            | 5.31            | 6.44         |
| Mn          | 12            | 0.61            | 0.46            | 5.19            | 6.25         |
| Mn          | 13            | 0.59            | 0.53            | 5.31            | 6.44         |
| Mn          | 14            | 0.61            | 0.46            | 5.19            | 6.25         |
| Mn          | 15            | 0.59            | 0.53            | 5.31            | 6.44         |
| Mn          | 16            | 0.61            | 0.46            | 5.19            | 6.25         |
| Mn          | 17            | 0.59            | 0.53            | 5.31            | 6.44         |
| Mn          | 18            | 0.61            | 0.46            | 5.19            | 6.25         |

**Table S10.** Atom population analysis of NMM-0.05.

| <b>Atom</b> | <b>Number</b> | <b><i>s</i></b> | <b><i>p</i></b> | <b><i>d</i></b> | <b>Total</b> |
|-------------|---------------|-----------------|-----------------|-----------------|--------------|
| Mn          | 1             | 0.63            | 0.28            | 5.5             | 6.42         |
| Mn          | 2             | 0.63            | 0.28            | 5.5             | 6.53         |
| Mn          | 3             | 0.63            | 0.28            | 5.5             | 6.41         |
| Mn          | 4             | 0.63            | 0.28            | 5.5             | 6.51         |
| Mn          | 5             | 0.63            | 0.28            | 5.5             | 6.37         |
| Mn          | 6             | 0.63            | 0.28            | 5.5             | 6.51         |
| Mn          | 7             | 0.55            | 0.36            | 5.37            | 6.29         |
| Mn          | 8             | 0.58            | 0.38            | 5.37            | 6.32         |
| Mn          | 9             | 0.62            | 0.23            | 5.54            | 6.39         |
| Mn          | 10            | 0.57            | 0.37            | 5.4             | 6.35         |
| Mn          | 11            | 0.58            | 0.45            | 5.42            | 6.45         |
| Mn          | 12            | 0.57            | 0.36            | 5.4             | 6.33         |
| Mn          | 13            | 0.58            | 0.41            | 5.38            | 6.36         |
| Mn          | 14            | 0.62            | 0.38            | 5.37            | 6.37         |
| Mn          | 15            | 0.61            | 0.48            | 5.47            | 6.55         |
| Mn          | 16            | 0.58            | 0.38            | 5.43            | 6.4          |
| Mn          | 17            | 0.59            | 0.48            | 5.45            | 6.51         |

## References

- [S1] J. G. Duan, C. Wu, Y. B. Cao, K. Du, Z. D. Peng, G. R. Hu, *Electrochim. Acta* **2016**, *221*, 14.
- [S2] S. Y. Xu, Y. S. Wang, L. B. Ben, Y. C. Lyu, N. N. Song, Z. Z. Yang, Y. M. Li, L. Q. Mu, H. T. Yang, L. Gu, Y. S. Hu, H. Li, Z. H. Cheng, L. Q. Chen, X. J. Huang, *Adv. Energy Mater* **2015**, *5*, 1501156.
- [S3] Y. S. Wang, L. Q. Mu, J. Liu, Z. Z. Yang, X. Q. Yu, L. Gu, Y. S. Hu, H. Li, X. Q. Yang, L. Q. Chen, X. J. Huang, *Adv. Energy Mater* **2015**, *5*, 1501005.
- [S4] B. Fu, X. Zhou, Y. P. Wang, *J. Power Sources* **2016**, *310*, 102.
- [S5] K. Y. Shen, M. Lengyel, L. Wang, R. L. Axelbaum, *MRS Commun* **2017**, *7*, 74.
- [S6] Q. C. Wang, Q. Q. Qiu, N. Xiao, Z. W. Fu, X. J. Wu, X. Q. Yang, Y. N. Zhou, *Energy Storage Mater* **2018**, *15*, 1.
